# Supplementary material for: A new cross-linked enzyme aggregate biocatalyst for NAD+-booster production
Source: Royal Society of Chemistry journal article supplement (doi:10.1039/c7ra00505a), 2017-01-01
Supplement: c7ra00505a1.pdf [file c7ra00505a1.pdf]

1 **Electronic Supplementary Information**

2 **A new cross-linked enzyme aggregate biocatalyst for a NAD<sup>+</sup>-booster**  
3 **production**

4 **Ana-Belén Martínez-Moñino<sup>a,b</sup>, Rubén Zapata-Pérez<sup>a,b</sup>, Antonio-Ginés García-**  
5 **Saura<sup>a,b</sup>, Juana Cabanes<sup>a,b</sup>, and Álvaro Sánchez-Ferrer<sup>a,b\*</sup>.**

6 <sup>a</sup>Department of Biochemistry and Molecular Biology-A, Faculty of Biology, Regional  
7 Campus of International Excellence “Campus Mare Nostrum”, University of Murcia,  
8 Campus Espinardo, E-30100 MURCIA, Spain.

9 <sup>b</sup>Murcia Biomedical Research Institute (IMIB), 30120 Murcia, Spain.

10 \*Corresponding author: Prof. Dr Álvaro Sánchez Ferrer

11 Fax: +34868884147, Tel: +34868884777

12 E-mail: alvaro@um.es

13 **Supplementary file captions**

14 **Table S1.** Activity recovery of the EcCinA-BSA-CLEAs as a function of mixing period and  
15 the system used.

16 **Fig. S1.** SDS-PAGE of purified EcCinA.

17 **Fig. S2.** Conversion of NMN into NaMN catalyzed by recombinant EcCinA.

18 **Fig. S3.** Effect of NMN concentration on EcCinA activity.

19

20 **Table S1**

21 Activity recovery of the EcCinA-BSA-CLEAs as a function of mixing period and the system  
 22 used.

| Vortex <sup>a</sup> |                       | FastPrep <sup>b</sup> |                       |
|---------------------|-----------------------|-----------------------|-----------------------|
| Time (min)          | Activity Recovery (%) | Time (min)            | Activity Recovery (%) |
| 0.5                 | 34 ± 1                | 0.16                  | 43 ± 1                |
| 30                  | 51 ± 2                | 0.33                  | 67 ± 1                |
| 60                  | 90 ± 2                | 0.5                   | 76 ± 3                |
|                     |                       | 0.66                  | 84 ± 2                |
|                     |                       | 0.83                  | 99 ± 1                |
|                     |                       | 1                     | 99 ± 1                |

23 The experiments were carried out in triplicate and the error  
 24 represents the percentage error in each set of readings.

25 <sup>a</sup>Mixing was carried out with a vortex at medium speed.

26 <sup>b</sup>Mixing was carried out with a FastPrep at a speed of 6.0 m/s.

27

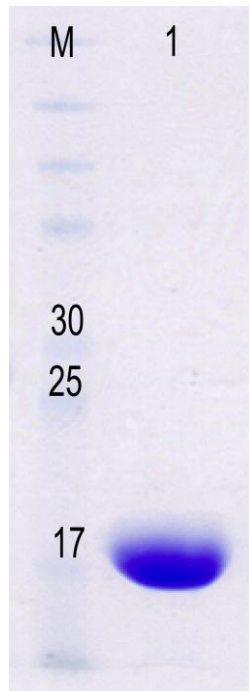

28

29 Fig. S1. SDS-PAGE of purified EcCinA. M: molecular weight standards (New England  
30 Biolabs: P7708S). Lane 1: Purified EcCinA (10  $\mu$ g) after HisTrap column step.

31

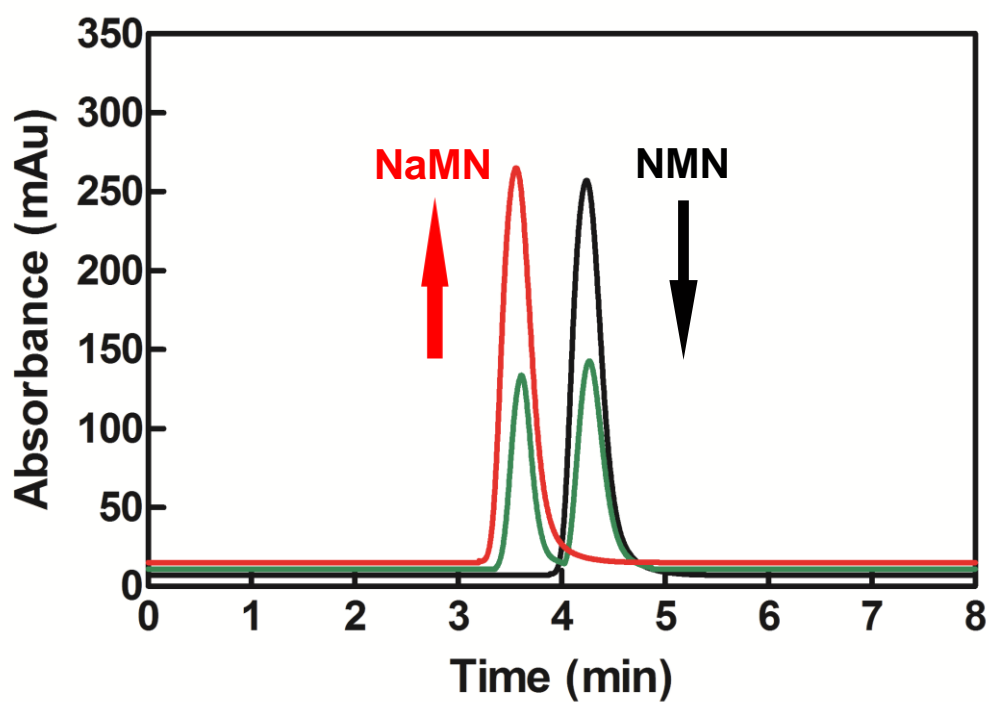

32

33 Fig. S2. Conversion of NMN into NaMN catalyzed by recombinant EcCinA. Black line

34 corresponds to 0 min, green line to 15 min and red line to 30 min. For the assay, free enzyme

35 (14 nM) was incubated at 37 °C with the substrate (0.5 mM NMN) in 50 mM Tris-HCl pH

36 8.5.

37

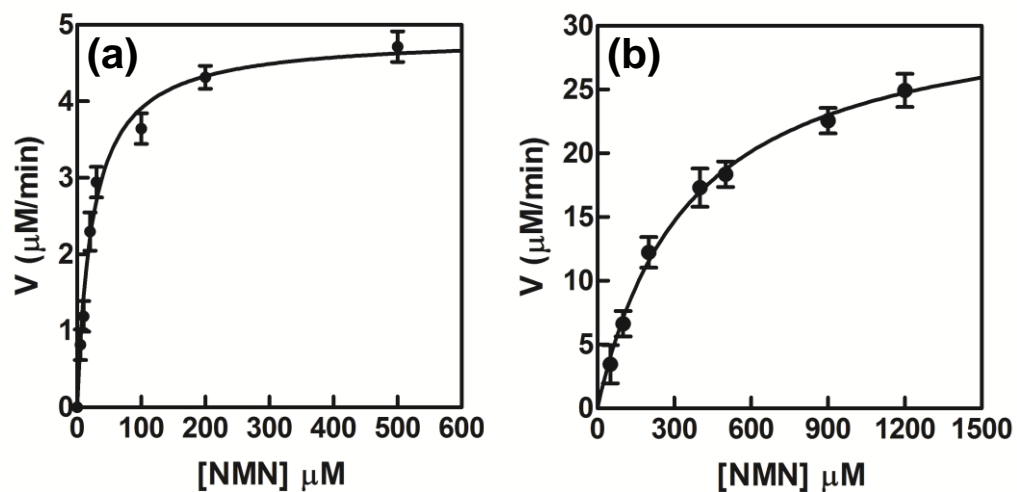

38

39 Fig. S3. Effect of NMN concentration on EcCinA activity. **(a)** Free enzyme. **(b)** EcCinA-  
 40 BSA-CLEAs. The activity was measured in the standard reaction conditions in the presence  
 41 of increasing concentrations of NMN.
